# Supplementary material for: A comprehensive analysis of microRNAs as diagnostic biomarkers for asthma
Source: PubMed Central journal article supplement — Ther Adv Respir Dis. 2020 Dec 23;14:1753466620981863. doi: 10.1177/1753466620981863 (PMC7768876; doi:10.1177/1753466620981863), 2020-12-23
Supplement: sj-pdf-4-tar-10.1177_1753466620981863.pdf [file sj-pdf-4-tar-10.1177_1753466620981863.pdf]

Reviewer 1 v.2

Comments to the Author

This is a lot better. I'm impressed with the improvement. I think they've covered my main points.

I have one remaining concern, I read through the QUADAS-2 and the Reitsma et al Bivariate Model papers, and there's no real accounting for the quality of the predictive methods used in each of the included (5) studies. I still think its likely these papers didn't replicate in independent populations, and it's also likely the models were trained on the same data they were tested upon. I then verified that the Rodrigo-Munez et al Allergy 2019 paper does indeed have these flaws. I suggest the authors include some kind of limitation stating that the methodologies employed do not assess the quality of the model generation in the included studies or their generalizability.
